# Supplementary material
Source: Research Square preprint supplement (doi:10.21203/rs.3.rs-8692432/v1)
Supplement: Supplementary file 1 [file 06753a5b96c9c9f8c7d9484c.docx]

**Supplementary Table.1 Clinicopathological features of patients with EEC for scRNA-seq.**

| **Clinicopathological features of patients with EEC for scRNA-seq** | | | | | | | | | | | | | |
| --- | --- | --- | --- | --- | --- | --- | --- | --- | --- | --- | --- | --- | --- |
| **Patient ID** | **Tumor tissues** | **Paratumor tissues** | **FIGO**  **stage** | **Lymph node**  **metastasis** | **Myometrial**  **invasion** | **ER** | **PR** | **Ki67** | **MLH1** | **MLH2** | **MSH6** | **PMS-2** |
| **Patient 1** | + | + | Ⅰb | - | >50% | + | + | 40%+ | + | + | + | + |
| **Patient 2** | + | + | Ⅰa | - | ＜50% | + | + | 30%+ | + | + | + | + |
| **Patient 3** | + | - | Ⅰa | - | ＜50% | + | + | 5%+ | + | + | + | + |
| **Patient 4** | - | + | Ⅰa | - | ＜50% | + | + | 50%+ | - | + | + | - |
| **Patient 5** | + | + | Ⅰa | - | ＜50% | + | + | 70%+ | - | + | + | - |
| **Patient 6** | + | - | Ⅱ | - | >50% | + | + | 10%+ | + | + | + | + |
