# Supplementary material
Source: Research Square preprint supplement (doi:10.21203/rs.3.rs-8692432/v1)
Supplement: Supplementary file 2 [file 393ebdd1e380cf470ddc00bb.docx]

**Supplementary Table.2 Correlation of high AREG protein expression with clinicopathological characteristics in 296 EEC**

| **Histopathology** | **Groups** | **No.** | **AREG** | | **χ2** | ***P* value** |
| --- | --- | --- | --- | --- | --- | --- |
| **+** | **-** |
| Age | ≥60 years  <60 years | 93  203 | 58  137 | 35  66 | 0.744 | 0.388 |
| FIGO stage | Ⅰ  Ⅱ  Ⅲ | 234  37  25 | 147  26  22 | 87  11  3 | 6.733 | 0.035* |
| Differentiation | Well  Moderate  Poor | 99  176  21 | 68  114  13 | 31  62  8 | 0.591 | 0.744 |
| Pelvic lymph node metastasis | Positive  Negative | 15  281 | 14  181 | 1  100 | 5.298 | 0.021* |
| Abdominal lymph node metastasis | Positive  Negative | 4  292 | 4  191 | 0  101 | 2.100 | 0.147 |
| Myometrial invasion | ≥1/2  <1/2 | 68  228 | 46  149 | 22  79 | 0.123 | 0.726 |
| ER expression | Positive  Negative  Unknown | 265  23  8 | 175  14  6 | 90  9  2 | 0.556 | 0.757 |
| PR expression  PTEN expression  Ki67 expression  P53 expression  PAX-2 expression | Positive  Negative  Unknown  Positive  Negative  Unknown  Positive  Negative  Positive  Negative  Unknown  Positive  Negative | 251  35  10  138  145  13  195  101  170  118  8  23  273 | 166  22  7  88  97  10  137  58  110  79  6  6  189 | 85  13  3  50  48  3  58  43  60  39  2  17  84 | 0.225  1.046  4.873  0.460  17.556 | 0.894  0.593  0.027*  0.794  <0.001* |

* *P* < 0.05.
