# Supplementary material
Source: Research Square preprint supplement (doi:10.21203/rs.3.rs-8692432/v1)
Supplement: Supplementary file 3 [file 728a77a144164a016ea9c5d2.docx]

Supplementary Table.4 Detailed information of antibodies

| Category | Brand | Experiment | Dilution ratio |
| --- | --- | --- | --- |
| AREG | Abmart #MK00655M | IHC | 1:200 |
| Ki67 | Abmart #T55212M | IHC | 1:200 |
| AREG | Abcam #Ab180722 | WB | 1:1 000 |
| GAPDH | Proteintech #0004-1-Ig | WB | 1:100 000 |
| EGFR | Proteintech #66455-1-Ig | WB | 1:1 000 |
| p-EGFR | Proteintech #30277-1-AP | WB | 1:1 000 |
| Smad2/3 | Wanleibio # WL01520 | WB | 1:1 000 |
| p-Smad2/3 | Wanleibio # WL02305 | WB | 1:1 000 |
| ZEB1 | Abclonal # A5600 | WB | 1:1 000 |
| E-cadherin | CST #3195 | WB | 1:1 000 |
| Vimentin | CST #5741 | WB | 1:1 000 |
| N-cadherin | Proteintech #22018-1-AP | WB | 1:1 000 |
| SNAI2 | Proteintech #12129-1-AP | WB | 1:1 000 |
| Goat anti-rabbit IgG | Bioworld # BS13278 | WB | 1:10 000 |
| Goat anti-mouse IgG | Bioworld # BS12478 | WB | 1:10 000 |
| AREG PE-Cyanine7 | eBioscience #25-5370-42 | FCM | 5 μL/Test |
| AREG | Abmart # MK00655M | IF | 1:200 |
| Ki67 | Abcam # Ab16667 | IF | 1:250 |
| Donkey anti-Rabbit IgG (H+L) Alexa Fluor 488 | Invitrogen # A-32790 | IF | 1:500 |
| Donkey anti-Mouse IgG (H+L) Alexa Fluor 555 | Invitrogen # A-32773 | IF | 1:500 |

WB: Western Blotting; IHC:Immunohistochemistry; FCM: Flow CytoMetry; IF: immunofluorescence.
