# Supplementary material
Source: Research Square preprint supplement (doi:10.21203/rs.3.rs-8692432/v1)
Supplement: Supplementary file 4 [file 926a1c26dc35181e7a1aad75.docx]

Supplementary Table.3

RT-qPCR primer sequence

| Gene |  | Sequence (5’-3’) |
| --- | --- | --- |
| GAPDH | Primer Forward | ACCCAGAAGACTGTGGATGG |
| Primer Reverse | TTCAGCTCAGGGATGACCTT |
| AREG | Primer Forward | GTGGTGCTGTCGCTCTTGATA |
| Primer Reverse | CCCCAGAAAATGGTTCACGCT |
